# Supplementary material
Source: HighWire-hosted journal article supplement (https://qdcxjkg.com/highwire/filestream/112717/field_highwire_adjunct_files/0/CME_33-5.pdf)
Supplement: CME_33-5.pdf [file CME_33-5.pdf]

# CME Credit Application Form (1 CME credit)

To receive CME credits, read the CME article in this issue, indicate the correct responses to the educational questions below and complete the requested information overleaf in full. This form is also available in electronic format at [www.erj.ersjournals.com/current.dtl](http://www.erj.ersjournals.com/current.dtl). To return your application, you can either:

➤ use this form and return it completed to ERSJ Ltd, 442 Glossop Road, Sheffield, S10 2PX, UK; fax to +44 114 2665064; or e-mail to [info@ersj.org.uk](mailto:info@ersj.org.uk)

➤ fill in the online form at [www.erj.ersjournals.com/current.dtl](http://www.erj.ersjournals.com/current.dtl)

Certificates will be e-mailed to the address filled in overleaf. Please allow 4 weeks for processing.

There is now a charge for CME credit applications. For £30 you can make six attempts at the educational questions in issues of the *ERJ*. The charge will apply to each application, whether or not the CME credit is awarded. When you have paid, a reference number will be issued. Please enter your reference number in section 2 if you have already paid, or fill in your credit card details in section 3 if you have not paid. Note that your application for CME credits will not be processed until payment is received in full.

## 1. Educational questions. Answer by marking the correct answer.

### 1. Which of the following statements is true?

- Skeletal muscle mitochondrial production of reactive oxygen species (ROS) in COPD patients is similar to that in control subjects.
- Skeletal muscle mitochondrial production of ROS in COPD patients is higher than in control subjects.
- Skeletal muscle mitochondrial production of ROS in COPD patients is lower than in control subjects.
- Skeletal muscle mitochondria are unable to produce ROS.

### 2. According to what has been found in the present study:

- Increased ROS production by the mitochondria in COPD is only seen in the skeletal muscles of the leg.
- Increased ROS production by the mitochondria in COPD is only seen in the respiratory skeletal muscles.
- Increased ROS production by the mitochondria in COPD is seen both in the leg and respiratory skeletal muscles.
- Increased ROS production by the muscles is probably of inflammatory origin because the mitochondria do not produce ROS.

### 3. According to what has been found in the present study:

- ROS production is lower in state 3 mitochondrial respiration (*i.e.* when ATP is produced) than in state 4 (*i.e.* when ATP is not being produced in significant amounts and the transmembrane potential is higher).
- ROS production is higher in state 3 mitochondrial respiration than in state 4.
- ROS production is about the same in state 3 mitochondrial respiration as in state 4.
- Mitochondrial ROS production is undetectable in either state 3 or state 4.

### 4. Mitochondrial ROS production in the skeletal cell:

- Has no implications to the cell.
- Can harm several fundamental structures such as the mitochondrion itself, particularly during exercise.
- Is the fundamental cause of COPD.
- Is offset by the myoglobin.

### 5. The apparent mechanism of mitochondrial excessive ROS production in the skeletal muscle is:

- Hyperactivity of the mitochondria.
- Loss of superoxide dismutase.
- Excess of Krebs cycle enzymes.
- Respiratory chain blockade (*i.e.* increased respiratory chain enzymes not translated into more oxygen uptake and ATP production).

Please turn the page and fill in your details

# CME Credit Application Form (continued)

## 2. Applicant personal details.

Reference No: ..... ERS Membership No. (if known): .....

Date of Birth (DD/MM/YYYY): .....

Family Name: ..... First Name: .....

Mailing Address: .....  
.....

Postal Code: ..... City: ..... Country: .....

Telephone: + ..... E-mail: .....

## 3. Payment details.

I agree for payment of £30 (pounds sterling) to be taken from my credit card (MasterCard and Visa only). Details are as follows:

Card Type: MasterCard / Visa (please circle)      Cardholder Name: .....

Cardholder Number .....

Start date: ..... Expiry date: .....

\*CV2 No: ..... Signature: .....

Cardholder Address: .....  
(if different from above address)

\*CV2 No: this is the number on the back of your card - without this number we are unable to process payments through the system

Unfortunately, we cannot accept payment by American Express. For payment enquiries, please speak to Joanne Abdy at the ERSJ Ltd  
Accounts Department: tel: +44 114 2672862; e-mail: joanne.abdy@ersj.org.uk

VAT No. 534 1778 39 Registered in England with Company Registration No. 2655805
